# Supplementary material for: Polymorphism in nanoparticle-based crystals depending upon their single or polycrystalline character
Source: Royal Society of Chemistry journal article supplement (doi:10.1039/c6ce01006g), 2016-01-01
Supplement: c6ce01006g3.pdf [file c6ce01006g3.pdf]

## Electronic Supplementary Information

### Polymorphism in nanoparticle-based crystals depending upon their single or polycrystalline character

*Nicolas Goubet\*, Pierre-Antoine Albouy, Andrew Thompson and Marie-Paule Pileni*

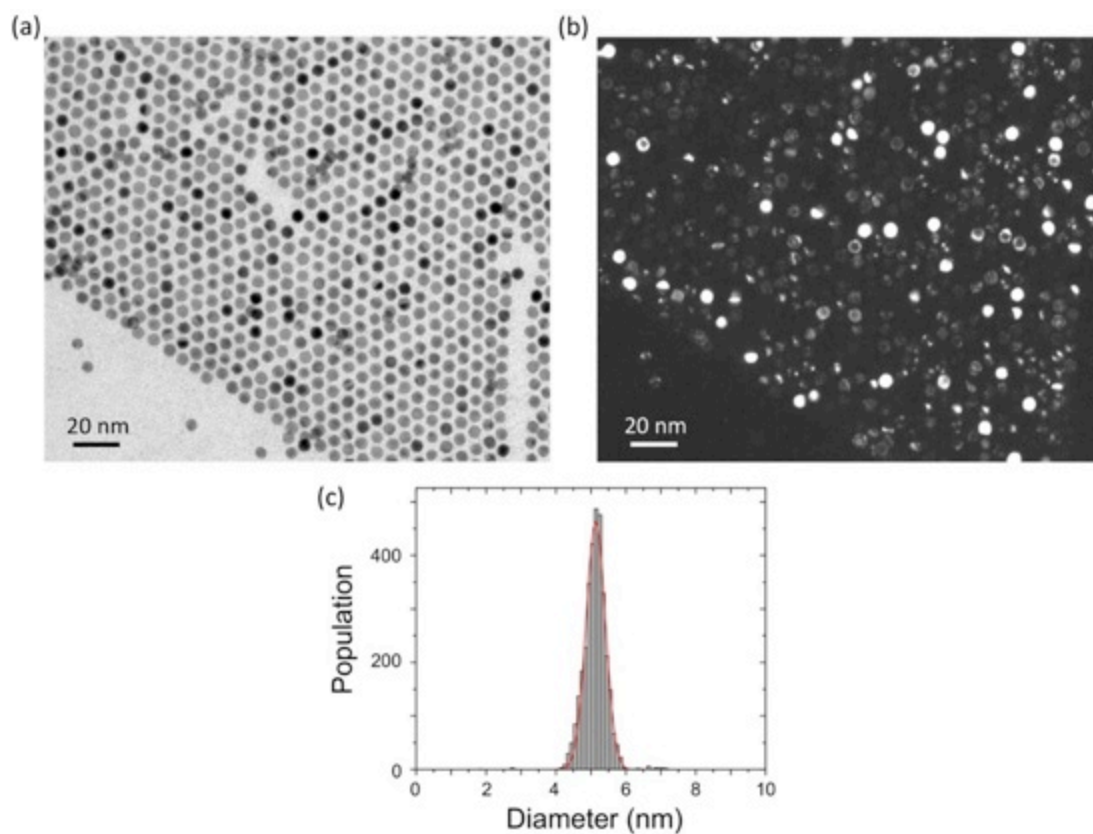

**Figure S1.** Bright (a) and dark (b) field TEM pictures of the as-synthesized gold nanocrystals with their size distribution (c).

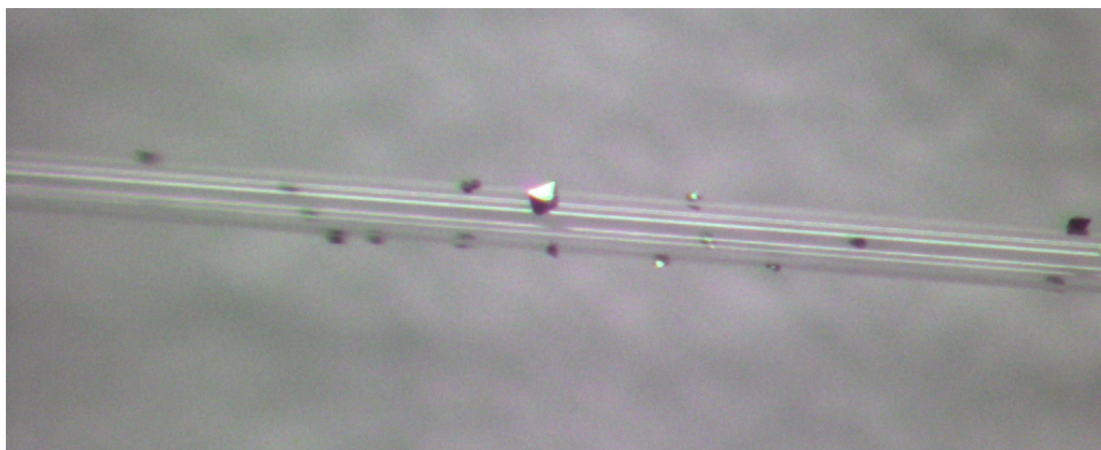

**Figure S2.** Optical micrograph of a capillary used to grow polyhedral superlattices.

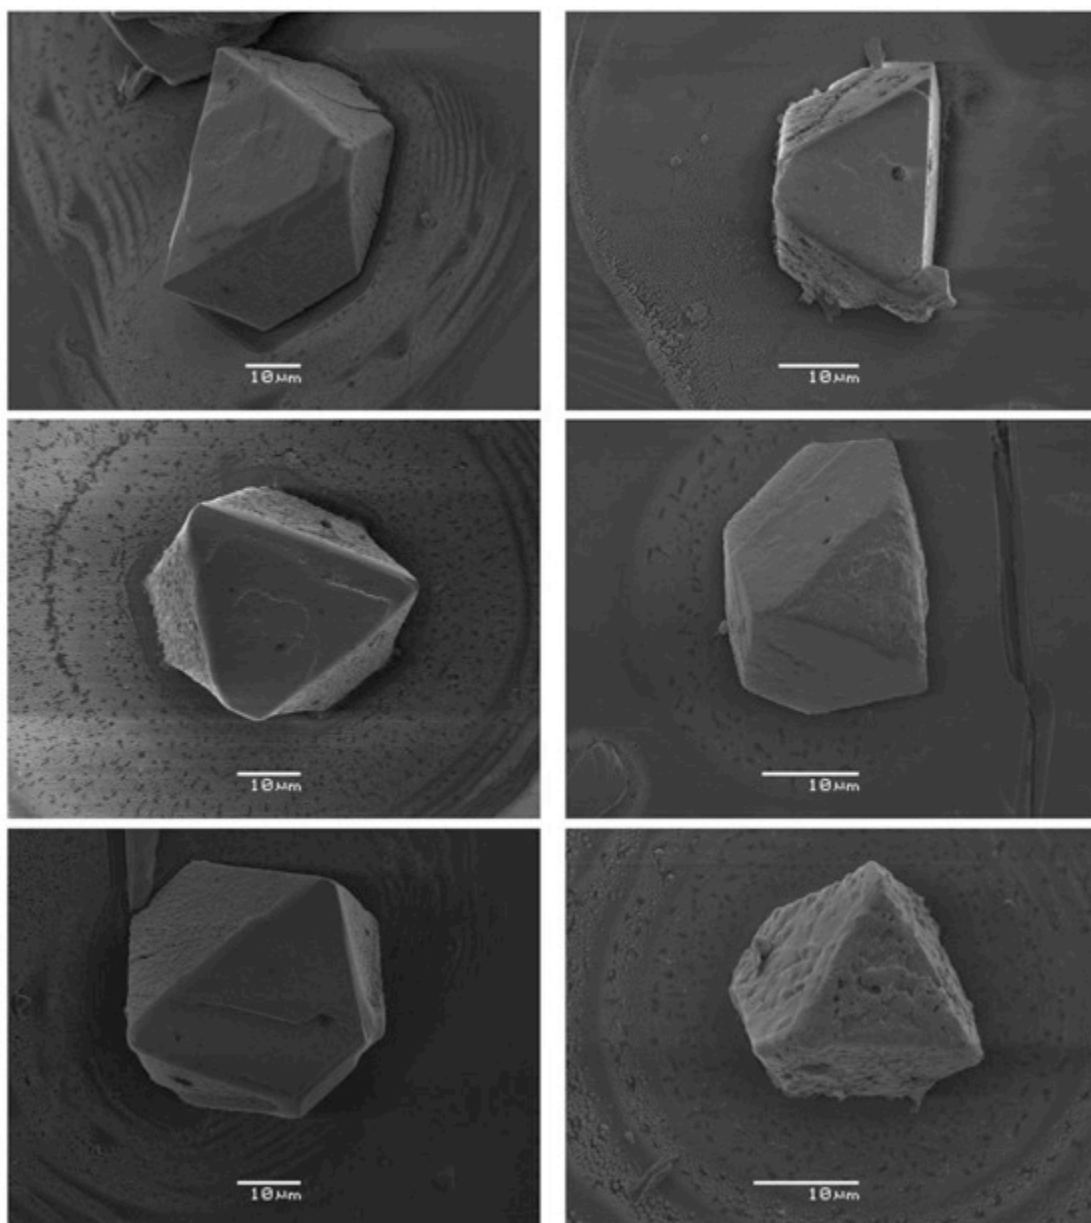

**Figure S3.** Typical polyhedral NC superlattice made of polycrystalline gold nanocrystals that are selected for the X-ray diffraction experiments.

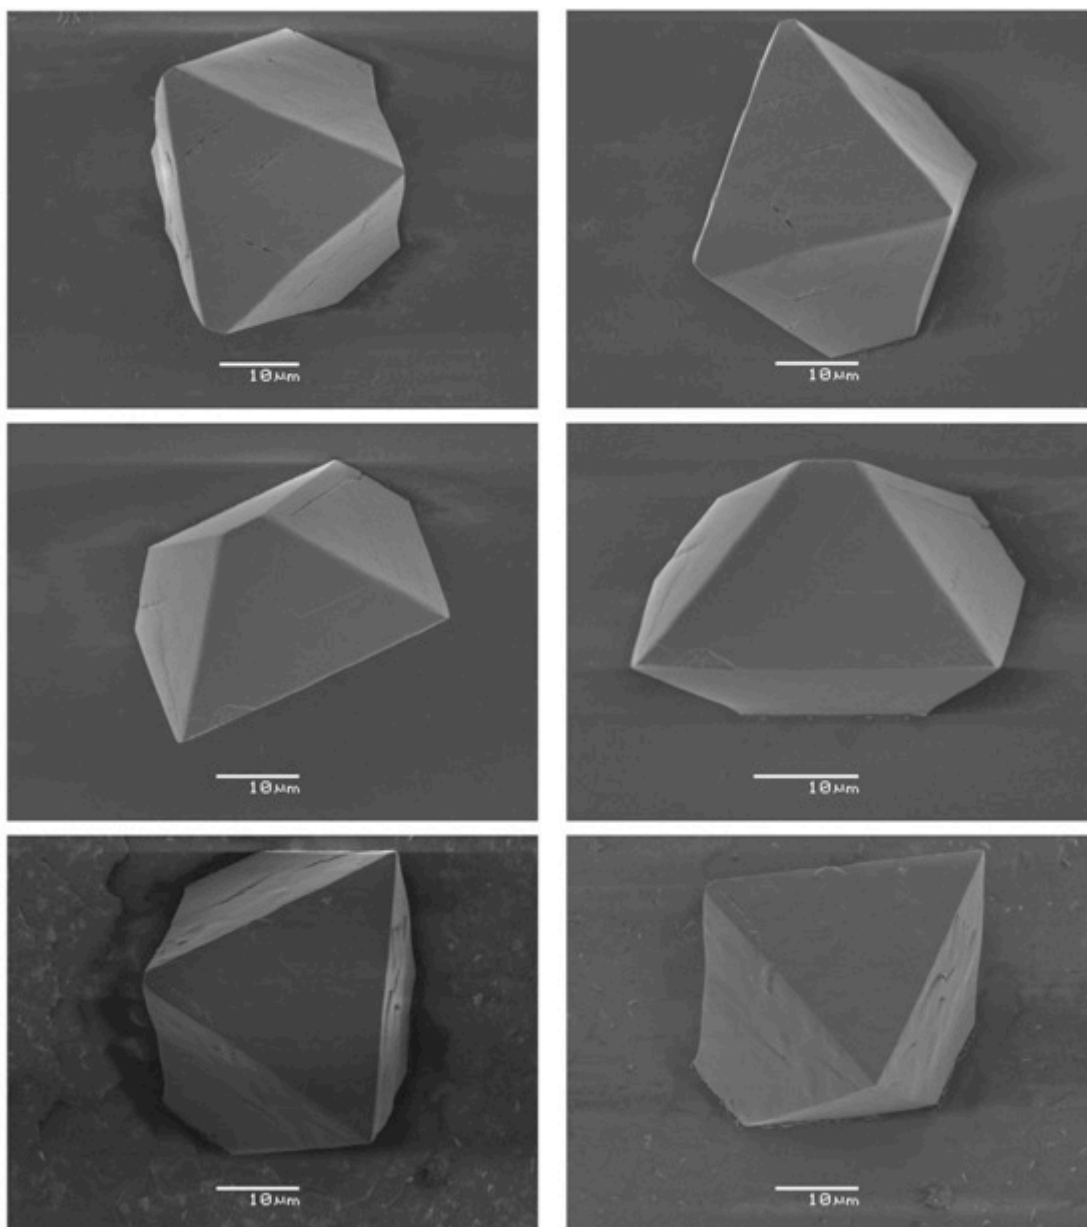

**Figure S4.** Typical polyhedral NC superlattice made of gold single crystals that are selected for the X-ray diffraction experiments.

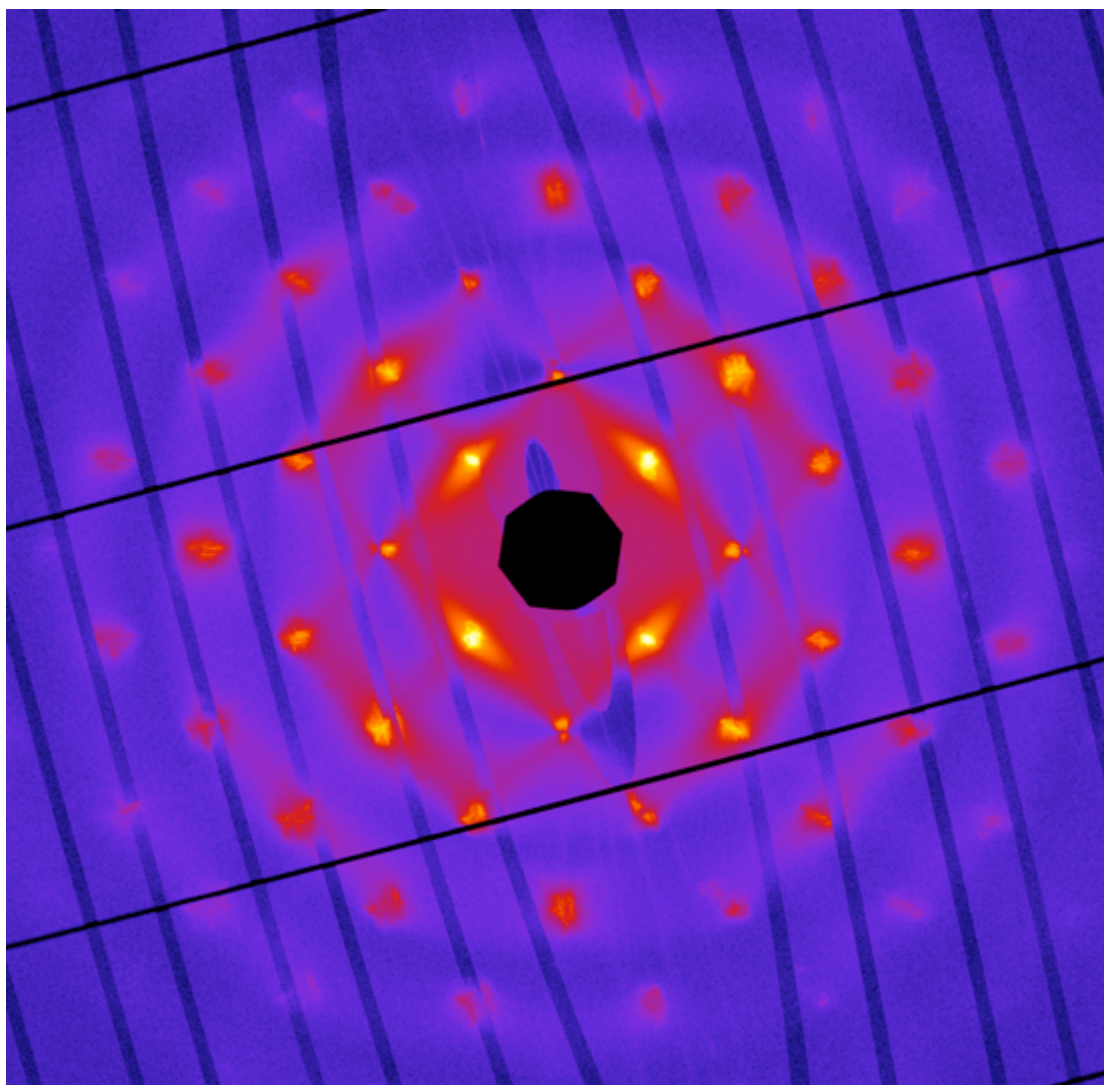

**Figure S5.** Reconstruction of reciprocal space planes of equation  $l=0$  at small  $q$  value ( $q_{\max}=7$   $\text{nm}^{-1}$ ) of one polyhedral nanocrystal superlattice made of gold single crystals.

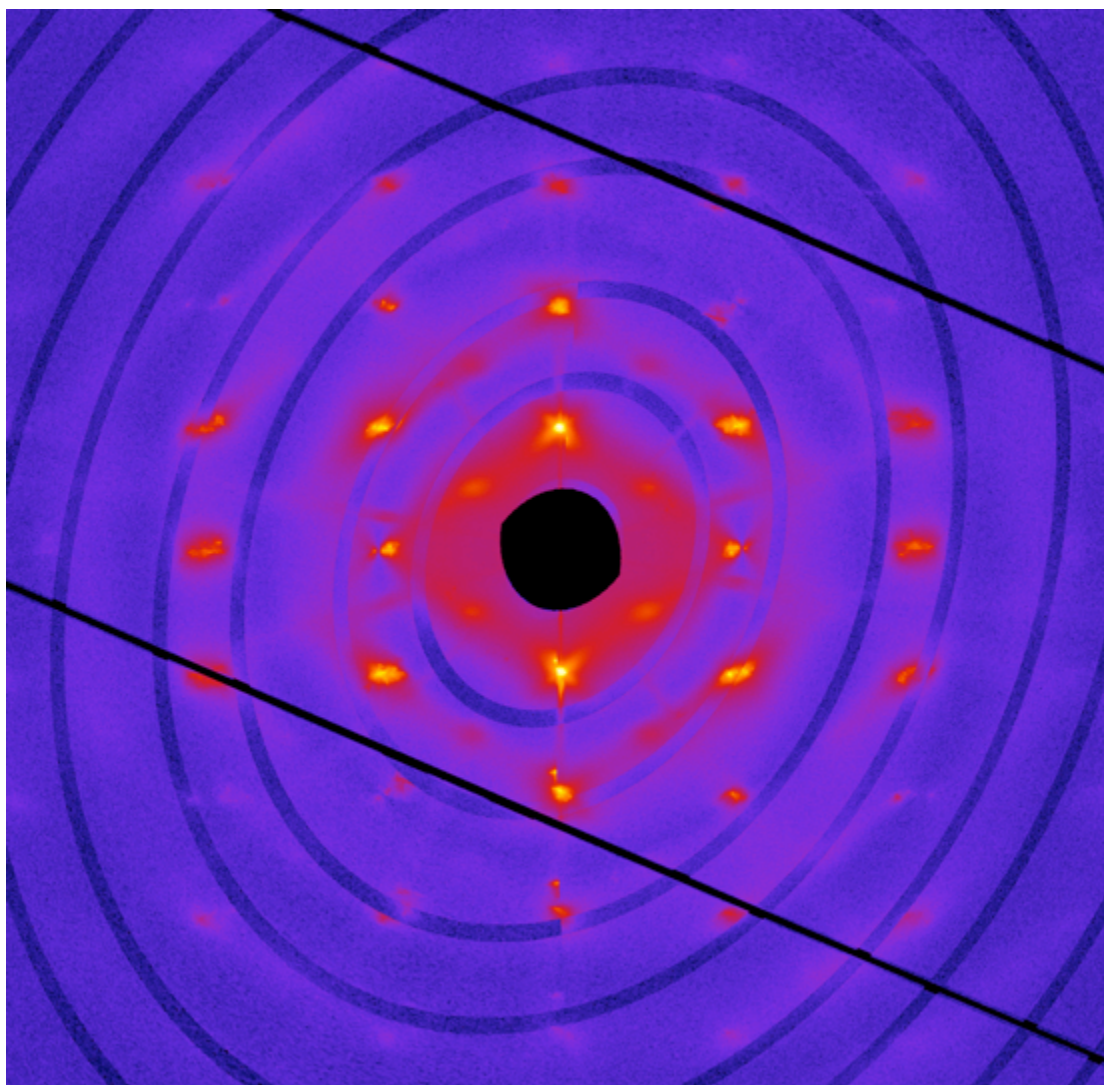

**Figure S6.** Reconstruction of reciprocal space planes of equation  $h+k=0$  at small  $q$  value ( $q_{\max}=7 \text{ nm}^{-1}$ ) of one polyhedral nanocrystal superlattice made of gold single crystals.

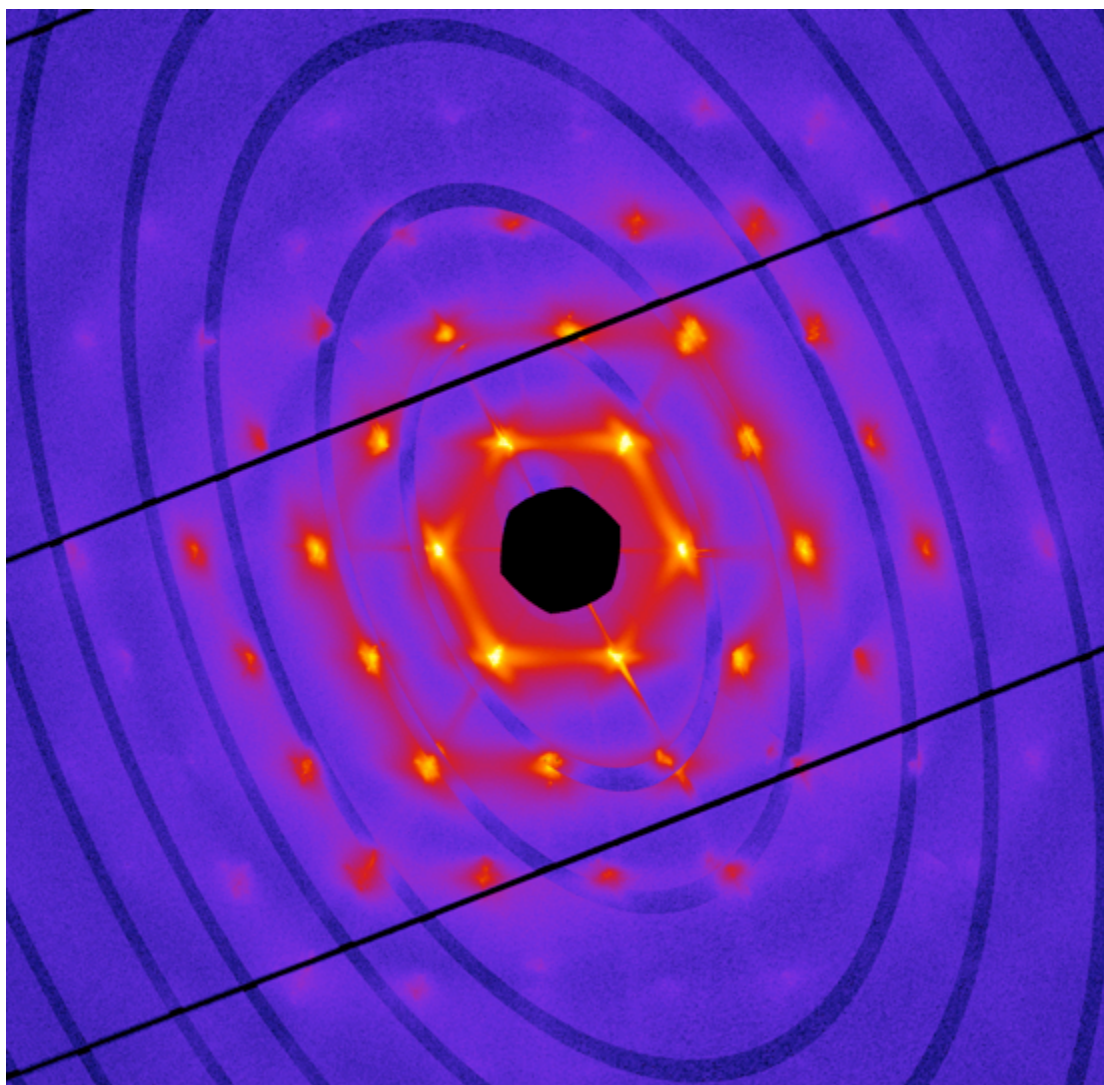

**Figure S7.** Reconstruction of reciprocal space planes of equation  $h+k+l=0$  at small  $q$  value ( $q_{\max}=7 \text{ nm}^{-1}$ ) of one polyhedral nanocrystal superlattice made of gold single crystals.

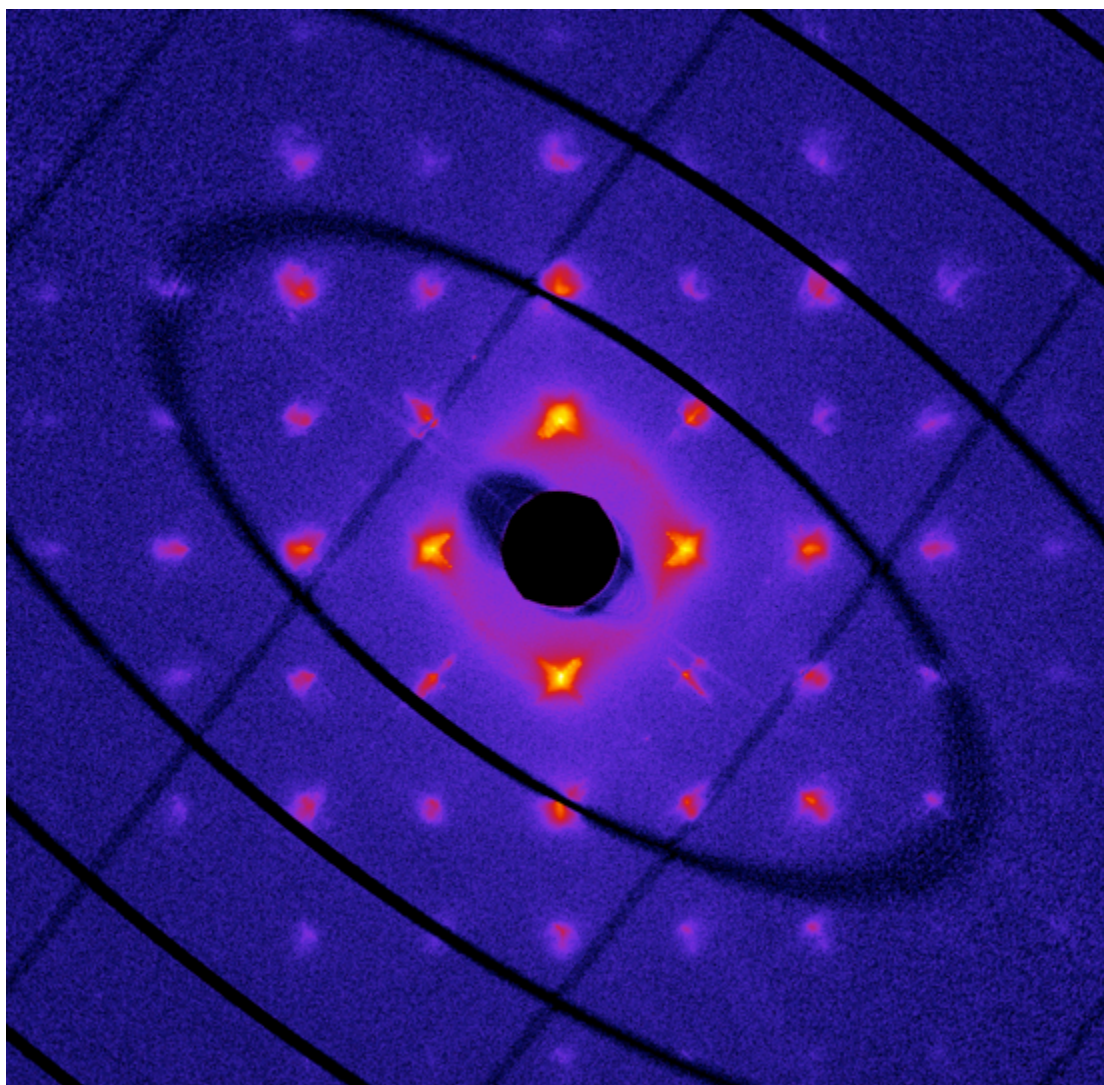

**Figure S8.** Reconstruction of reciprocal space planes of equation  $l=0$  at small  $q$  value ( $q_{\max}=7$   $\text{nm}^{-1}$ ) of one polyhedral nanocrystal superlattice made of gold polycrystals.



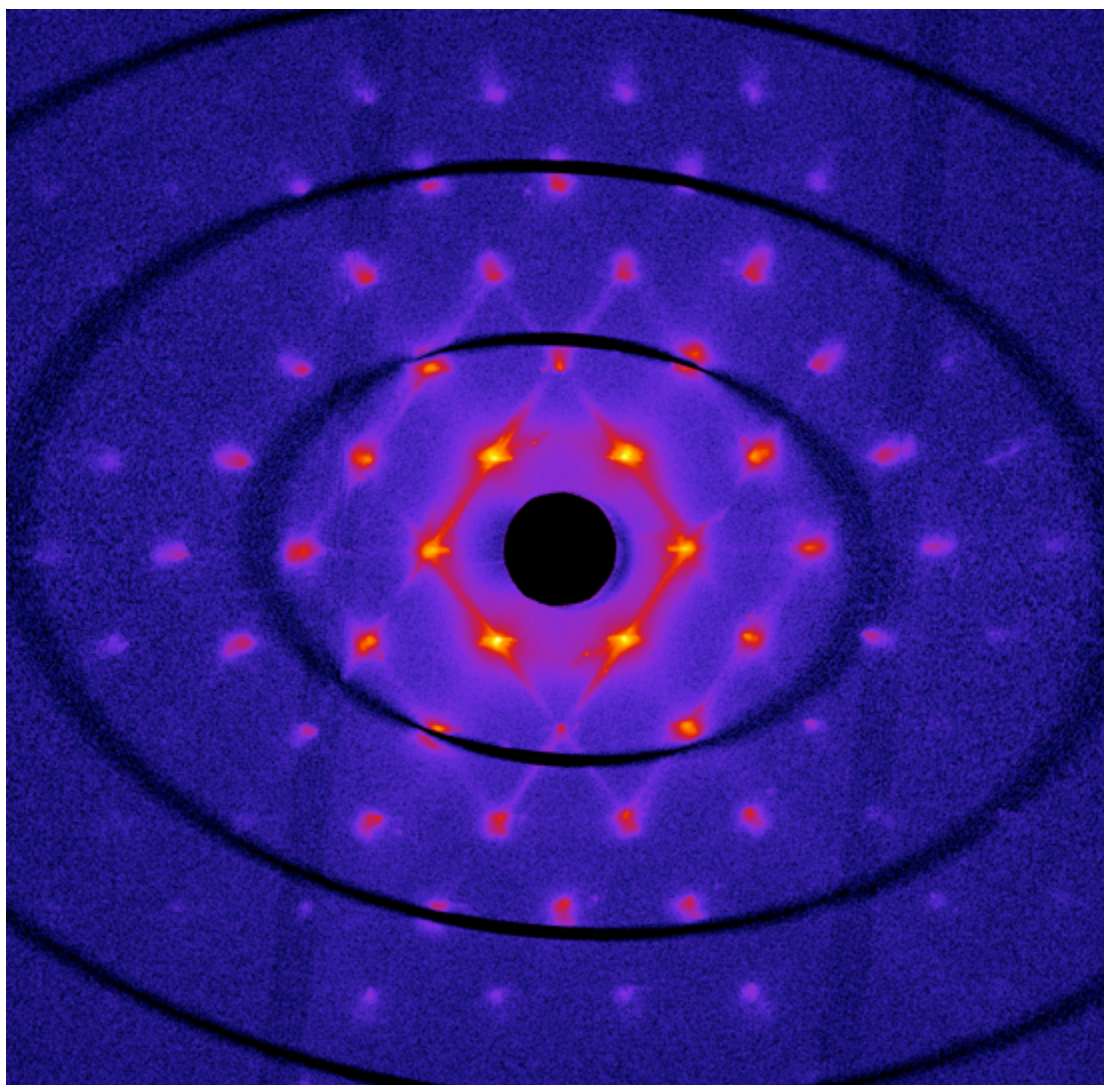

**Figure S9.** Reconstruction of reciprocal space planes of equation  $h+k=0$  at small  $q$  value ( $q_{\max}=7 \text{ nm}^{-1}$ ) of one polyhedral nanocrystal superlattice made of gold polycrystals.

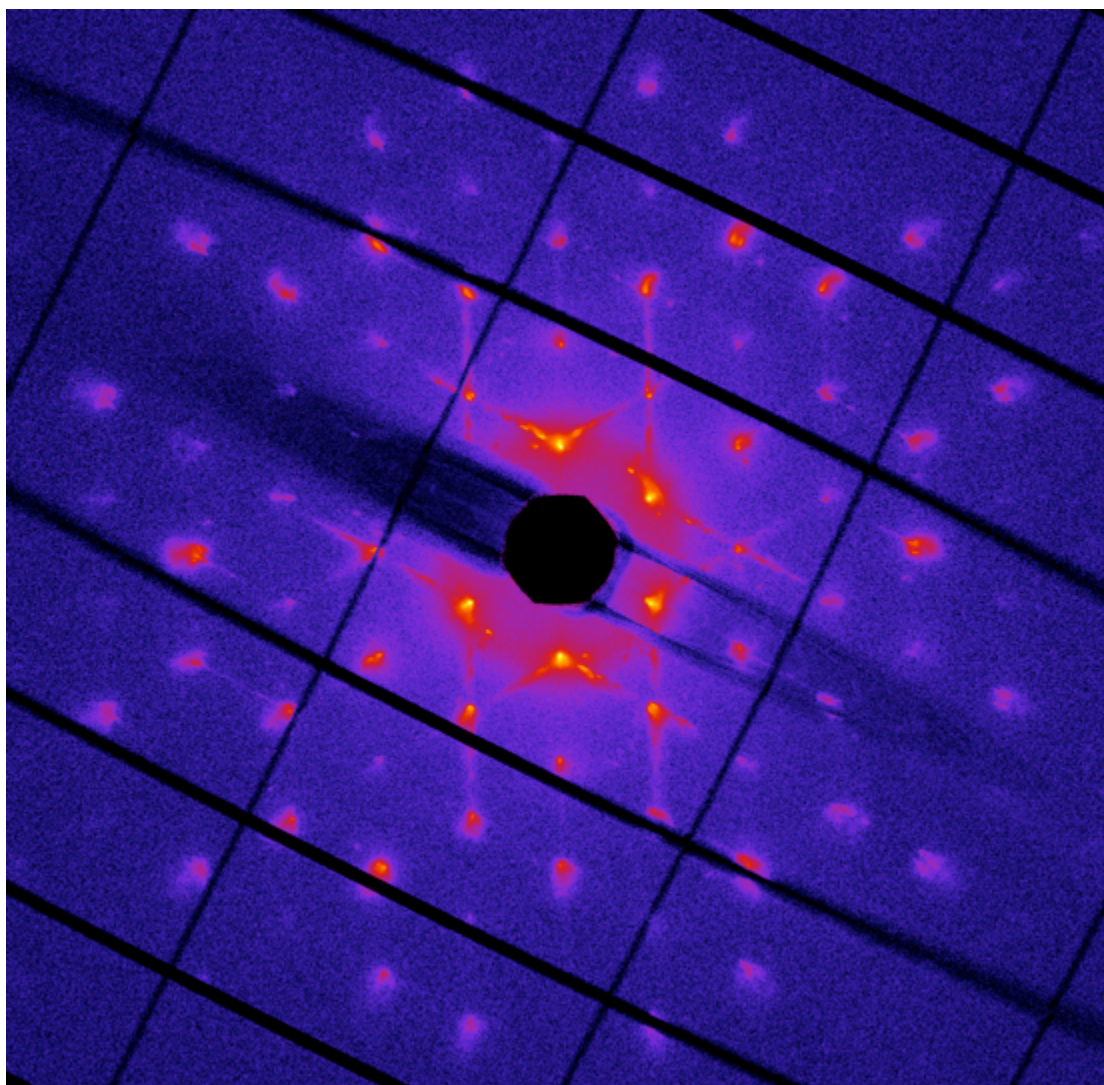

**Figure S10.** Reconstruction of reciprocal space planes of equation  $h+k+l=0$  at small  $q$  value ( $q_{\max}=7 \text{ nm}^{-1}$ ) of one polyhedral nanocrystal superlattice made of gold polycrystals.

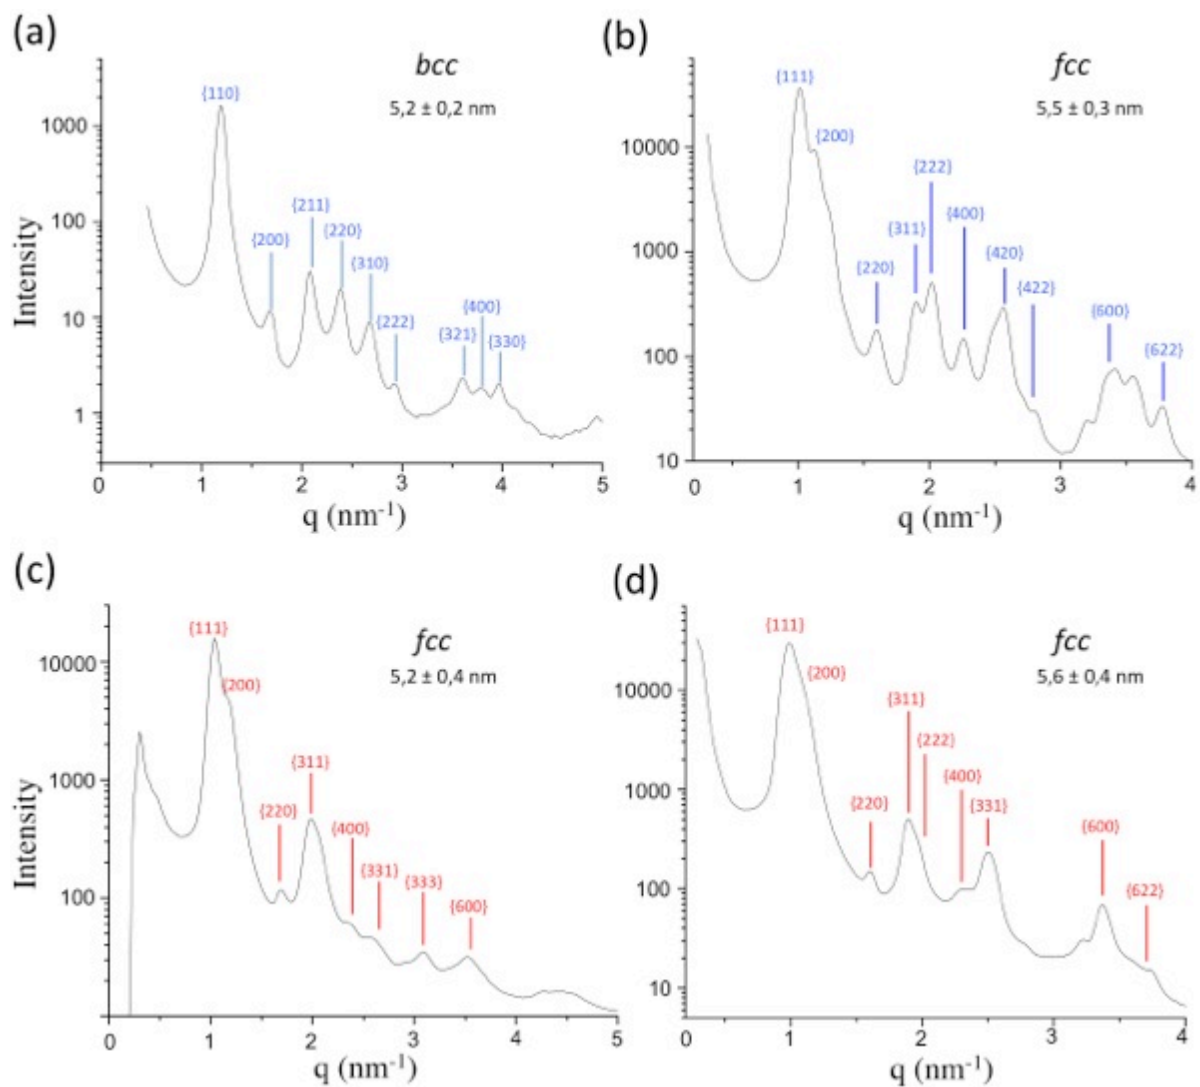

**Figure S11.** SAXS powder profiles for gold single (a-b) and polycrystals (c-d) with different size.

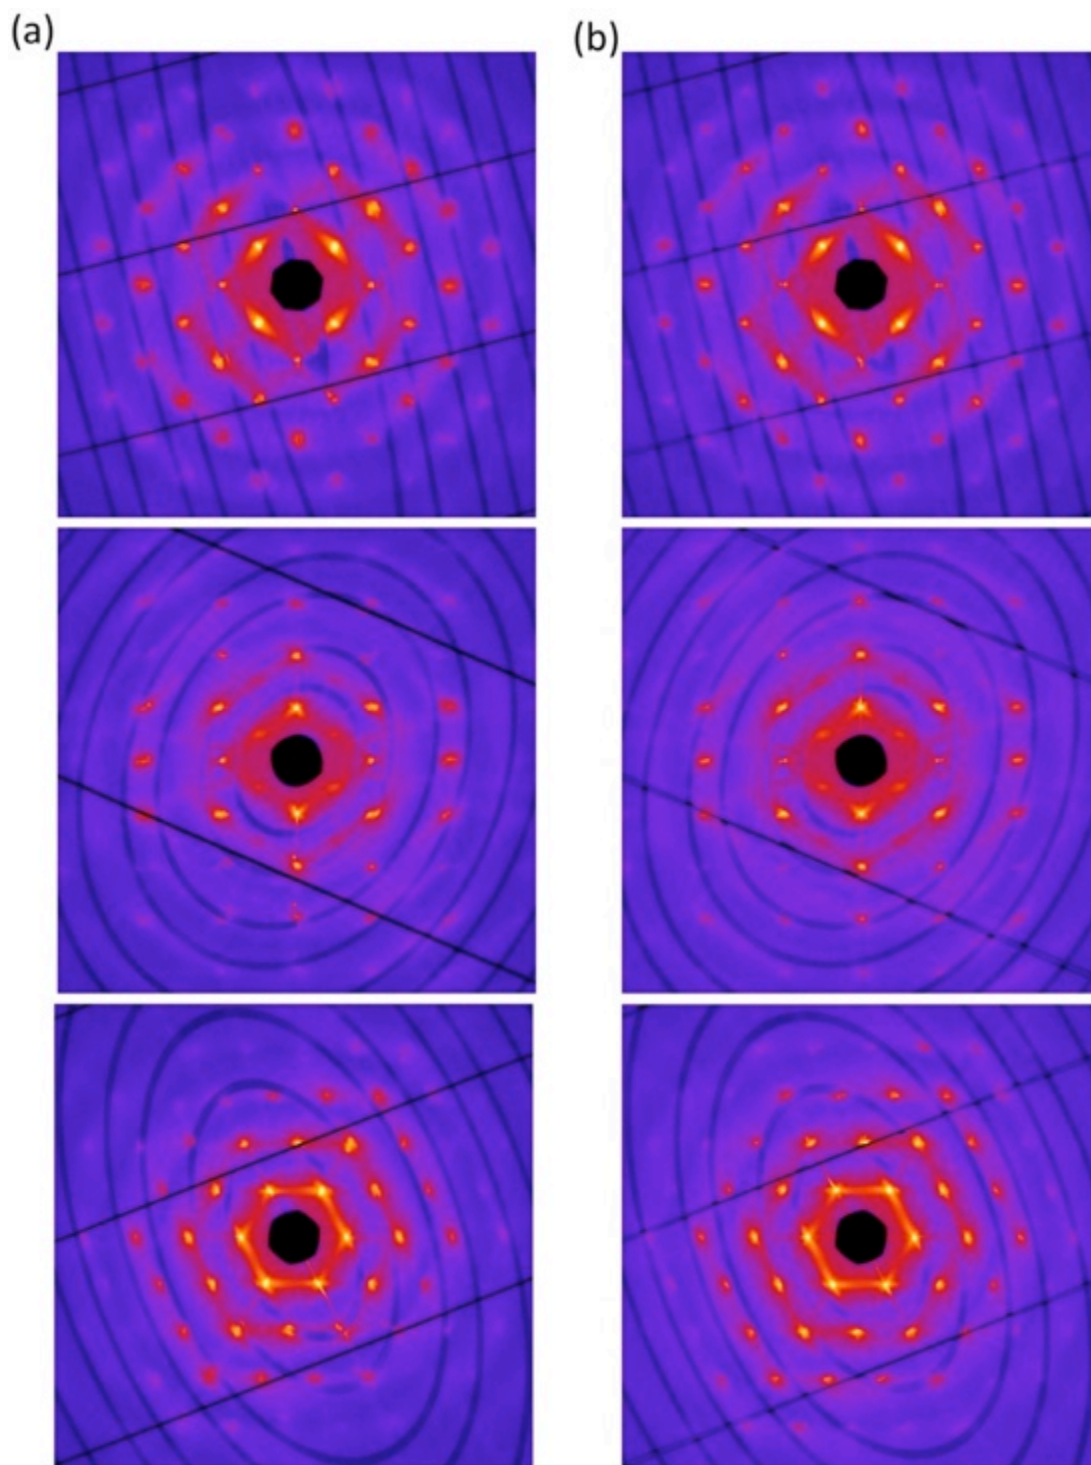

**Figure S12.** Reconstruction of reciprocal space planes of one polyhedral nanocrystal superlattice made of gold single crystals at 110K (a) and 290K (b).

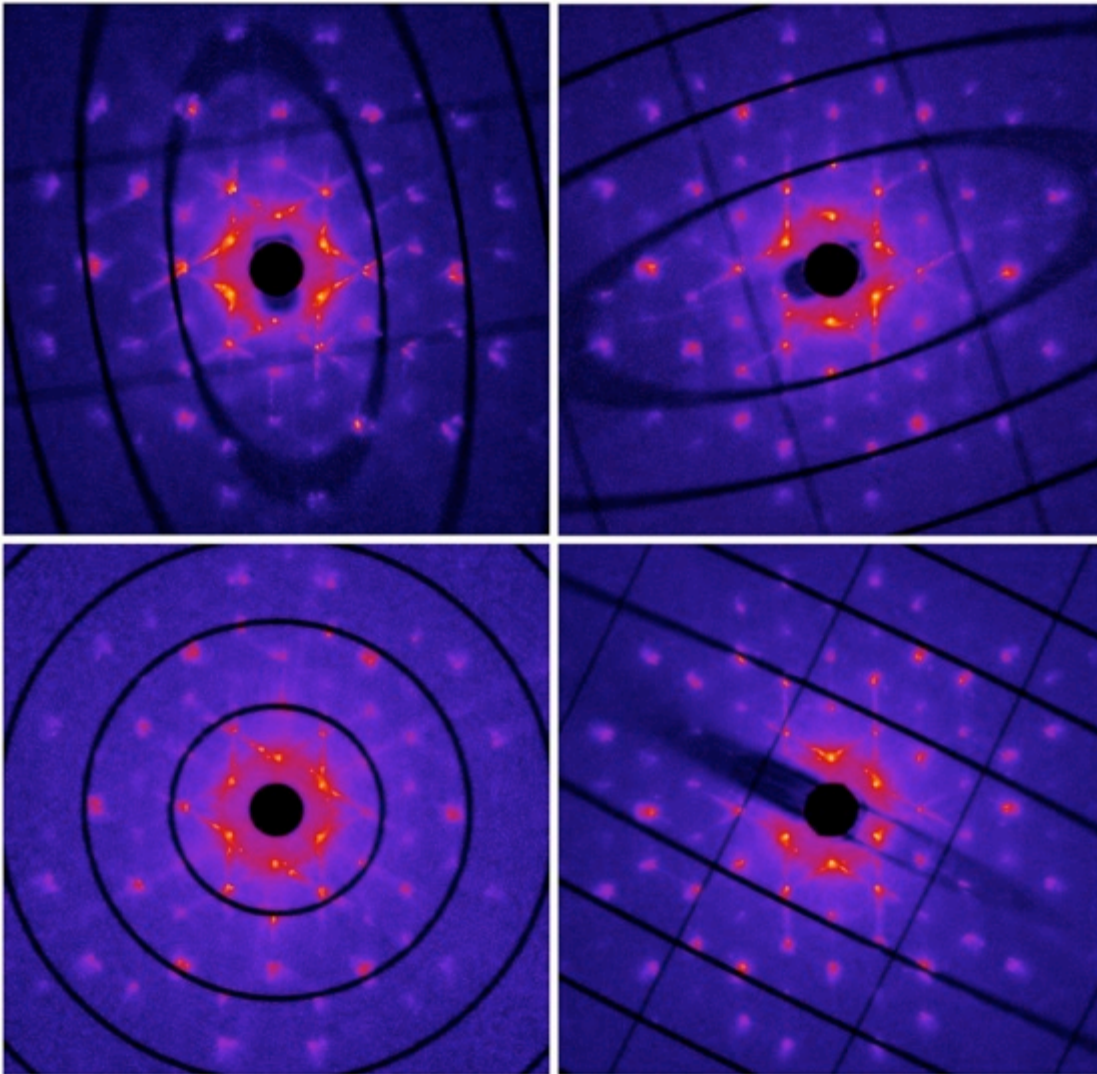

**Figure S13.** The 4 possible reconstructions of reciprocal space planes of equation  $h+k+l=0$  of one polyhedral nanocrystal superlattice made of gold polycrystals.

## Calculation of the inorganic core density in the colloidal crystal

In the case of BCC superlattice:

$$\Phi_{bcc} = \frac{2 \times \frac{4}{3} \times \pi \times \left(\frac{D_{TEM}}{2}\right)^3}{a_{bcc}^3} = 29.5\%$$

where  $d_{inor}$  is the metallic NC diameter determined by TEM and  $a_{bcc}$  is the *bcc* unit cell.

In the case of FCC superlattice:

$$\Phi_{fcc} = \frac{4 \times \frac{4}{3} \times \pi \times \left(\frac{D_{TEM}}{2}\right)^3}{a_{fcc}^3} = 29.5\%$$

where  $d_{inor}$  is the metallic NC diameter determined by TEM and  $a_{fcc}$  is the *fcc* unit cell.
